# Supplementary material for: Targeting the heme protein hemoglobin by (−)-epigallocatechin gallate and the study of polyphenol–protein association using multi-spectroscopic and computational methods
Source: Royal Society of Chemistry journal article supplement (doi:10.1039/c9cp05301h), 2019-12-19
Supplement: c9cp05301h1.pdf [file c9cp05301h1.pdf]

**Targeting the heme protein hemoglobin by (-)-epigallocatechin gallate and the study of polyphenol-protein association using multi-spectroscopic and computational methods**

Sourav Das<sup>a</sup>, Sharat Sarmah<sup>a</sup>, Zaved Hazarika<sup>b,\$</sup>, Mostofa Ataur Rohman<sup>c</sup>, Pallavi Sarkhel<sup>d</sup>,  
Anupam Nath Jha<sup>b,\$</sup> and Atanu Singha Roy<sup>a,\*</sup>

<sup>a</sup>Department of Chemistry, National Institute of Technology Meghalaya, Shillong 793003,  
India

<sup>b</sup>Department of Molecular Biology and Biotechnology, Tezpur University, Tezpur 784028,  
India

<sup>c</sup>Centre for Advanced Studies, Department of Chemistry, North-Eastern Hill University,  
Shillong 793022, India

<sup>d</sup>Department of Chemistry, Birla Institute of Technology Mesra, Jharkhand 835215, India

<sup>\$</sup>The authors contributed solely towards MD Simulation studies

**\*Corresponding Author:** Atanu Singha Roy

Tel.: +91 364 2501294

Fax: +91 364 2501113

Email: singharoyatanu@gmail.com; asroy86@nitm.ac.in

## **Supporting Information**

### **S1. Detailed Methodologies**

#### **S1.1. UV-vis absorption spectral studies**

The absorbance spectroscopic studies were performed using a PerkinElmer Lambda 35 UV-vis spectrophotometer using a quartz cuvette of 1 cm path length in the range of 200–700 nm at 20 mM Tris-HCl buffer (pH 7.4). For the ground state complexation experiment, a 1.5  $\mu\text{M}$  solution of BHb was taken and for complex formation, 4.5  $\mu\text{M}$  of EGCG solution was added. All the UV-vis spectral measurements were carried out at room temperature.

#### **S1.2. Fluorescence spectroscopy**

All the fluorescence emission studies were carried out in Fluoromax-4 Jobin Yvon (Horiba Scientific, Japan) except the three dimensional fluorescence studies which were carried out on a Cary Eclipse spectrofluorimeter.

A Fluoromax-4 Jobin Yvon (Horiba Scientific, Japan) spectrofluorimeter equipped with a Newport temperature controller (Model 350 B, California, USA) was utilized for carrying out the temperature dependent fluorescence emission studies using quartz cell of 1 cm path length and a slit width of 5/5 nm with an integration time of 0.3 sec. A 3  $\mu\text{M}$  BHb solution was titrated successively with EGCG solution (0-32.25  $\mu\text{M}$ ) at different temperatures (288, 295, 303 and 310 K) by using an excitation wavelength of 295 nm (selective excitation of the Trp fluorophore).

The excited-state lifetime experiments for determining the nature of quenching mechanism involved in the complexation of BHb with EGCG was carried out on a Pico Master Time-correlated single photon counting (TCSPC) lifetime instrument (PM-3) from Photon Technology International (PTI), USA. A 295 nm excitation LED source was used to excite the samples and the corresponding emission decay profiles of the samples were recorded at a magic

angle of 54.7°. The emission wavelength was set up at 337 nm for collecting the data. A colloidal suspension of coffee whitener was used to record the IRF (instrument response function). For this experiment, a 3 µM solution of BHp and its complex with EGCG at a molar ratio of 1:0, 1:2 and 1:4 was taken. The precision of the graphical fits was accessed by (a) visual inspection of the decay profiles, (b)  $\chi^2$  values and the Durbin–Watson (DW) parameter. The Levenberg–Marquardt algorithm,<sup>1,2</sup> was used to express the decay profiles as the sum of exponential functions (eqn. S1).

$$F(t) = \sum_i \alpha_i \exp\left(-\frac{t}{\tau_i}\right) \quad \text{S1}$$

where  $\alpha_i$  is the amplitude of  $i^{\text{th}}$  component corresponding to the fluorescence lifetime  $\tau_i$ . The average lifetime ( $\tau_{\text{avg}}$ ) was estimated using the following eqn. S2.<sup>3</sup>

$$\tau_{\text{avg}} = \frac{\sum_i \alpha_i \tau_i^2}{\sum_i \alpha_i \tau_i} \quad \text{S2}$$

Three-dimensional (3D) fluorescence measurements was performed on a Cary Eclipse spectrofluorimeter from Agilent Technologies fitted with a PCB 1500 water Peltier system at 295 K. For this experiment, a 3 µM solution of BHp and its 1:4 complex with EGCG were scanned in the emission wavelength range of 250-500 nm with 1 nm interval. Simultaneously, the excitation wavelength was fixed at 200-380 nm with 5 nm increments and a slow scan speed was maintained. The slit width was maintained at 10/5 nm.

### **S1.3. Circular dichroism (CD) measurements**

The secondary structural alterations in the protein on interaction with EGCG were determined through far-UV CD analysis, performed on a JASCO J-1500 instrument with a quartz cuvette

of 0.1 cm path length at room temperature. The data for each spectrum was collected at an interval of 0.1 nm having 100 nm min<sup>-1</sup> scan speed with a response time of 4 s. For determining structural components of BHb using the DICHROWEB online server,<sup>4</sup> the spectra of 2.5 μM BHb and its complexes with EGCG prepared at different concentrations (5.0, 16.12 and 32.25 μM) were scanned in the range of 190–240 nm. In addition to the online server DICHROWEB, the α-helical content was also determined using the following equations (eqn. S3).<sup>5,6</sup>

$$MRE_{208} = \frac{\theta_{obs}}{C_p \times l \times n \times 10} \quad S3$$

where  $\theta_{obs}$  indicates the CD in millidegrees,  $l$  is the path length of the cuvette,  $n$  is the number of amino acid residues, and  $C_p$  is the total concentration of the protein used. Following this, the percentage of the α-helical content of BHb was evaluated considering the MRE value at 208 nm using the following equation (eqn. S4).<sup>7,8</sup>

$$\alpha - helix = \frac{-MRE_{208} - 4000}{33000 - 4000} \times 100 \quad S4$$

where 33000 is correspond to the MRE value of pure α-helix at 208 nm and 4000 is the MRE value at 208 nm for the β-form and random coil conformation.

#### **S1.4. Fourier transform infrared spectroscopy (FTIR)**

The FTIR spectra of native BHb and its complex with EGCG were collected on a PerkinElmer Spectrum Two instrument equipped with a single reflection diamond universal attenuated total reflectance (UATR) accessory having a spectral resolution of 0.5 cm<sup>-1</sup>. A solution of BHb (10 mg/ mL) was prepared in 20 mM Tris HCl buffer (pH 7.4), and its concentration determined spectrophotometrically, based on its concentration a complex of BHb-EGCG in the molar ratio of 1:2 was prepared and incubated for 2 h before recording of the spectrum. A 256 scan interferogram was used to obtain each of the spectra and then corrected by subtracting the corresponding blank.

#### **S1.5. Preparation of samples for BHb glycation studies**

BHb (5 mg/mL) samples were incubated in 20 mM Tris-HCl buffer (pH 7.4) containing 1 mM sodium azide at 37 °C for 3 days in the absence and presence of 20 mM Glyoxal (GO) solution and EGCG (100 µM). The native BHb incubated without GO or EGCG for 3 days under the same condition treated as the control. At different intervals of time, aliquots were taken out of the reaction mixtures for fluorescence studies.

### **S1.6. UV irradiation (UVI) mediated photo-oxidative damage studies**

The photo-oxidative damage studies were carried out according to the procedure described by Pan. et al. (2012).<sup>9</sup> Briefly, samples of BHb (10 µM) in 20 mM Tris-HCL buffer (pH 7.4) were irradiated in a UV sterilizing chamber fitted with a light source of 254 nm having electrical power of 11 W for 60 minutes (at an interval of 10 mins) in the absence and presence of EGCG (100 µM). The fluorescence emission intensity of the samples was recorded in the range of 400-650 nm using an excitation wavelength of 365 nm. To figure out the presence of reactive oxygen species (ROS) responsible for the fluorescence enhancement, the BHb solution and its 1:10 complex with EGCG were incubated in the dark for 10 mins in the presence of 0.1 mM H<sub>2</sub>O<sub>2</sub> and then were subjected to UVI treatment as mentioned above.

### **References**

- 1 D. V O'Connor and D. Phillips, in *Time-Correlated Single Photon Counting*, Academic Press, 1984, pp. 36–54.
- 2 N. Maurya, J. K. Maurya, M. Kumari, A. B. Khan, R. Dohare and R. Patel, *J. Biomol. Struct. Dyn.*, 2017, **35**, 1367–1380.
- 3 J. R. Lakowicz, *Principles of Fluorescence Spectroscopy Principles of Fluorescence Spectroscopy*, 2006.
- 4 L. Whitmore and B. A. Wallace, *Nucleic Acids Res.*, 2004, **32**, W668-73.
- 5 R. Patel, M. ud din Parray, U. K. Singh, A. Islam, P. Venkatesu, S. Singh and H. B. Bohidar, *Colloids Surfaces A Physicochem. Eng. Asp.*, 2016, **508**, 150–158.

- 6 N. J. Greenfield and G. D. Fasman, *Biochemistry*, 1969, **8**, 4108–4116.
- 7 M. ud din Pararray, M. U. H. Mir, N. Dohare, N. Maurya, A. B. Khan, M. S. Borse and R. Patel, *J. Mol. Liq.*, 2018, **260**, 65–77.
- 8 N. Maurya, M. ud din Pararray, J. K. Maurya, A. Kumar and R. Patel, *Spectrochim. Acta - Part A Mol. Biomol. Spectrosc.*, 2018, **199**, 32–42.
- 9 L. Pan, X. Wang, S. Yang, X. Wu, I. Lee, X. Zhang, R. A. Rupp and J. Xu, *PLoS One*, 2012, **7**, e44142.

## Supporting Figures

**Fig. S1**

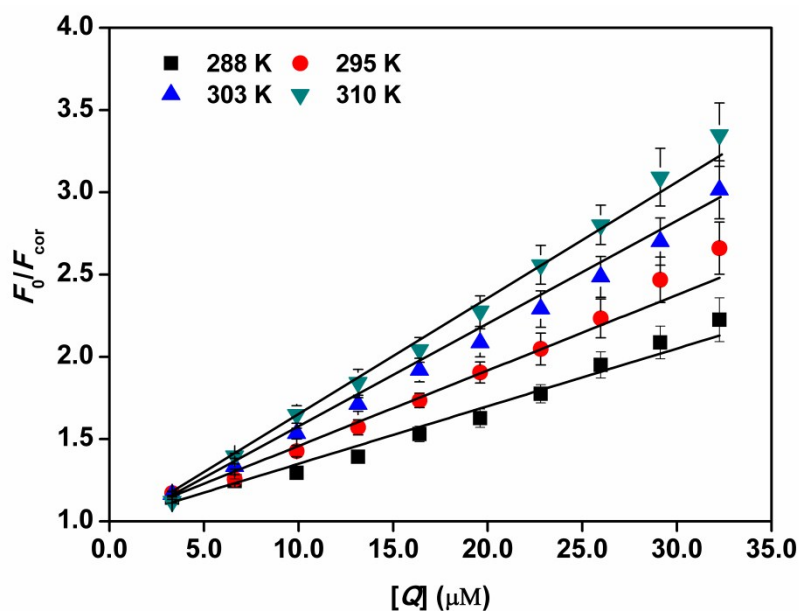

**Fig. S1.** Stern-Volmer plots for the interaction of EGCG with BHp at different temperatures in 20 mM Tris-HCl buffer of pH 7.4.



**Fig. S2**

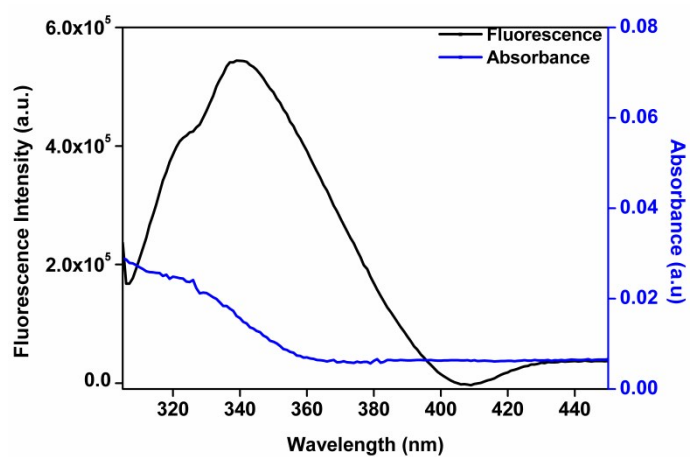

**Fig. S2.** Spectral overlap between the fluorescence emission of BHb and the absorbance profile of EGCG. [BHb]=[EGCG]= 3  $\mu$ M.



**Fig. S3**

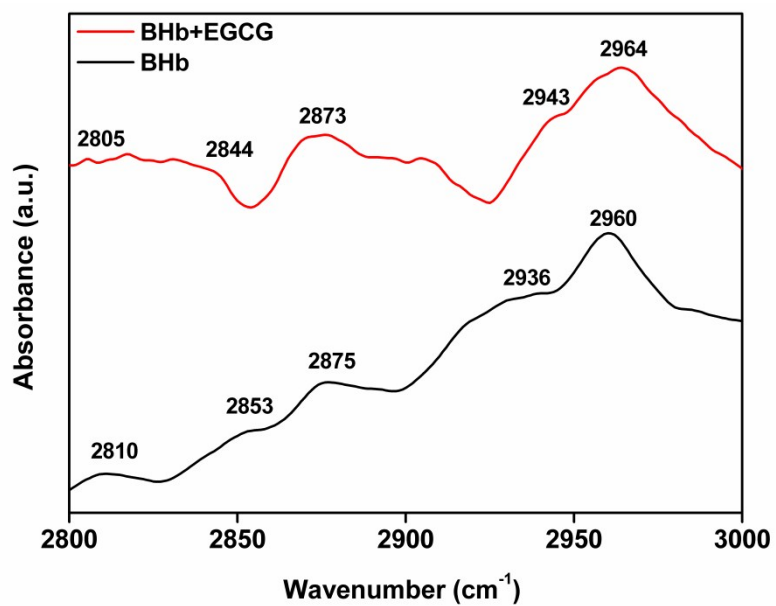

**Fig. S3.** FTIR spectra of CH<sub>2</sub> and CH<sub>3</sub> stretching vibrations in BHp and its complex with EGCG in the region 3000-2800 cm<sup>-1</sup>.

Fig. S4

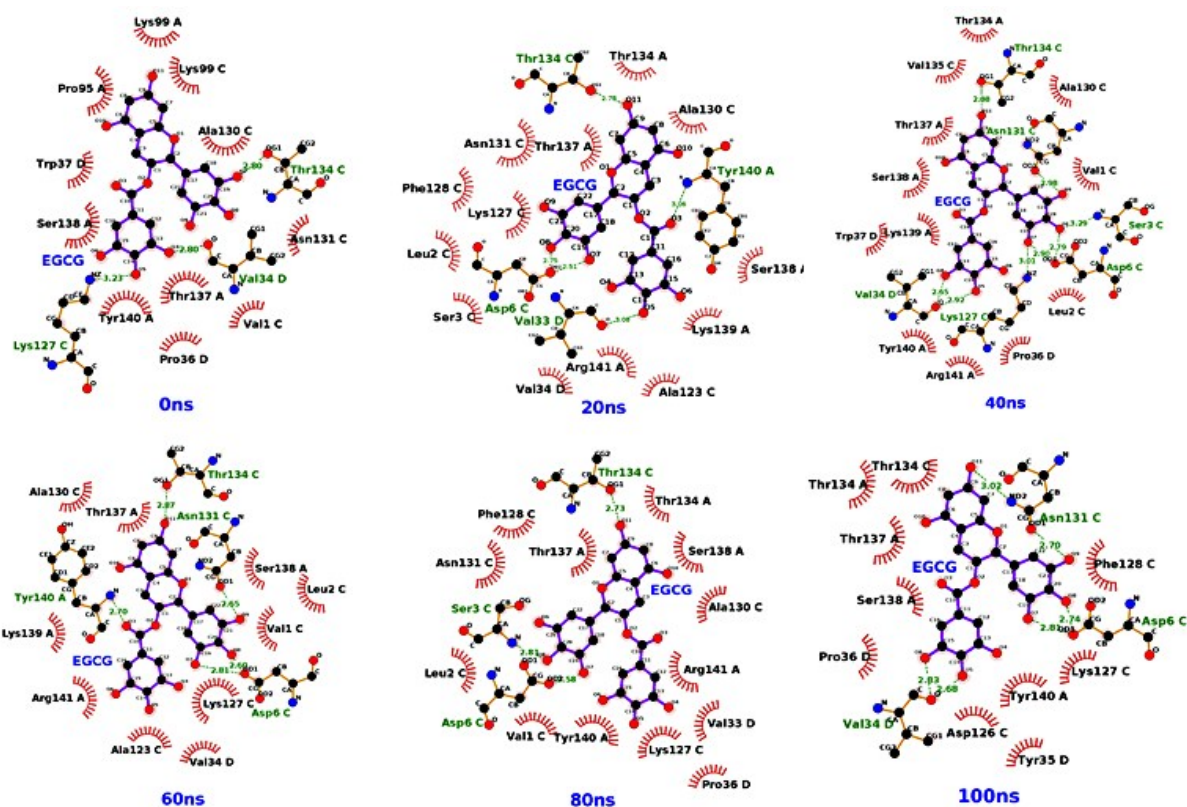

Fig. S4. The 2D interaction maps representing the interaction of EGCG with neighbouring residues of BHB at an interval of 20 ns.  $\alpha_1$ -chain= A,  $\alpha_2$ -chain= C,  $\beta_1$ -chain= B,  $\beta_2$ -chain= D.

## Supporting Tables

**Table S1.** Stern Volmer parameters for the interaction of EGCG with BHb at different temperatures.

| Temp. (K) | $K_{SV}$ ( $10^4$ , $M^{-1}$ ) | $k_q$ ( $10^{13}$ , $M^{-1}s^{-1}$ ) |
|-----------|--------------------------------|--------------------------------------|
| 288       | 3.50±0.32                      | 2.14                                 |
| 295       | 4.80±0.43                      | 2.94                                 |
| 303       | 5.76±0.47                      | 3.53                                 |
| 310       | 6.90±0.53                      | 4.23                                 |

\*±standard error

**Table S2.** Characteristics 3D fluorescence spectral parameters associated with native BHb and its complex with EGCG.

| System          | Peak 1 (nm)           |                       | Stokes shift<br>$\Delta\lambda$ (nm) | Intensity<br>(a.u.) | Peak 2 (nm)           |                       | Stokes shift<br>$\Delta\lambda$ (nm) | Intensity<br>(a.u.) |
|-----------------|-----------------------|-----------------------|--------------------------------------|---------------------|-----------------------|-----------------------|--------------------------------------|---------------------|
|                 | $\lambda_{\text{ex}}$ | $\lambda_{\text{em}}$ |                                      |                     | $\lambda_{\text{ex}}$ | $\lambda_{\text{em}}$ |                                      |                     |
| <b>BHb</b>      | 285                   | 333                   | 48                                   | 65                  | 235                   | 332                   | 97                                   | 43                  |
| <b>BHb-EGCG</b> | 285                   | 332                   | 47                                   | 47                  | 235                   | 332                   | 97                                   | 27                  |

**Table S3.** Comparison of the  $\alpha$ -helical percentage (%) content of BHb obtained using equation (eqn. S3-S4) and DICHROWEB.

| <b>Complex</b>           | <b>Using eqn. (S3-S4)</b> | <b>DICHROWEB (online server)</b> |
|--------------------------|---------------------------|----------------------------------|
| BHb                      | 37.46 $\pm$ 1.03          | 54.35 $\pm$ 2.25                 |
| BHb-EGCG (5.0 $\mu$ M)   | 33.74 $\pm$ 0.31          | 49.85 $\pm$ 0.25                 |
| BHb-EGCG (16.12 $\mu$ M) | 19.49 $\pm$ 0.60          | 36.85 $\pm$ 0.15                 |
| BHb-EGCG (32.25 $\mu$ M) | 4.63 $\pm$ 0.29           | 17.10 $\pm$ 3.40                 |

\* $\pm$ standard error

**Table S4.** Docking summary of BHB with EGCG by the Autodock 4.2 program generating different ligand conformations with the help of Lamarckian GA.

| <b>Rank</b> | <b>Binding energy<br/>(kcal mol<sup>-1</sup>)</b> | <b><math>K_i</math> (<math>\mu</math>M)</b> | <b><math>K_b</math> (<math>10^5</math>, M<sup>-1</sup>)</b> | <b>Cluster RMS</b> | <b>Ref. RMS</b> |
|-------------|---------------------------------------------------|---------------------------------------------|-------------------------------------------------------------|--------------------|-----------------|
| 1           | -7.82                                             | 1.85                                        | 6.12                                                        | 0.00               | 65.57           |
| 2           | -7.76                                             | 2.05                                        | 5.52                                                        | 0.00               | 63.45           |
| 3           | -7.65                                             | 2.47                                        | 4.58                                                        | 0.00               | 51.61           |
| 4           | -7.54                                             | 2.95                                        | 3.80                                                        | 0.00               | 50.62           |
| 5           | -6.96                                             | 7.97                                        | 1.41                                                        | 1.52               | 49.99           |
| 6           | -7.12                                             | 6.03                                        | 1.85                                                        | 0.00               | 51.36           |
| 7           | -6.67                                             | 12.94                                       | 0.86                                                        | 0.00               | 45.23           |
| 8           | -6.66                                             | 13.22                                       | 0.84                                                        | 0.00               | 48.63           |
| 9           | -5.18                                             | 159.97                                      | 0.07                                                        | 0.00               | 64.91           |
| 10          | -5.12                                             | 178.05                                      | 0.06                                                        | 0.00               | 74.37           |

\* $K_b$  calculated at 295 K

**Table S5.** Number of non-bonded interactions involved in BHb-EGCG complexation during the course of simulation time.

| Time (ns) | No. of non-bonded Interactions |                          |
|-----------|--------------------------------|--------------------------|
|           | Hydrogen-Bond                  | Hydrophobic Interactions |
| 0         | 5                              | 17                       |
| 20        | 6                              | 14                       |
| 40        | 6                              | 12                       |
| 60        | 5                              | 15                       |
| 80        | 5                              | 16                       |
| 100       | 5                              | 17                       |
